# Supplementary material for: Non-Targeted Metabolite Profiling Reveals Host Metabolomic Reprogramming during the Interaction of Black Pepper with Phytophthora capsici
Source: MDPI journal article supplement (doi:10.3390/ijms222111433), 2021-10-22
Supplement: s1 [file s1]

([alanine, aspartate, glutamate], [glycine, serine, threonine], [cysteine, methionine], [arginine and proline]), bioenergy(citrate and pyruvate), nucleotide metabolism(purines and pyrimidines), vitamin B6 metabolism and the biosynthesis of unsaturated fatty acids.

**Figure S2**

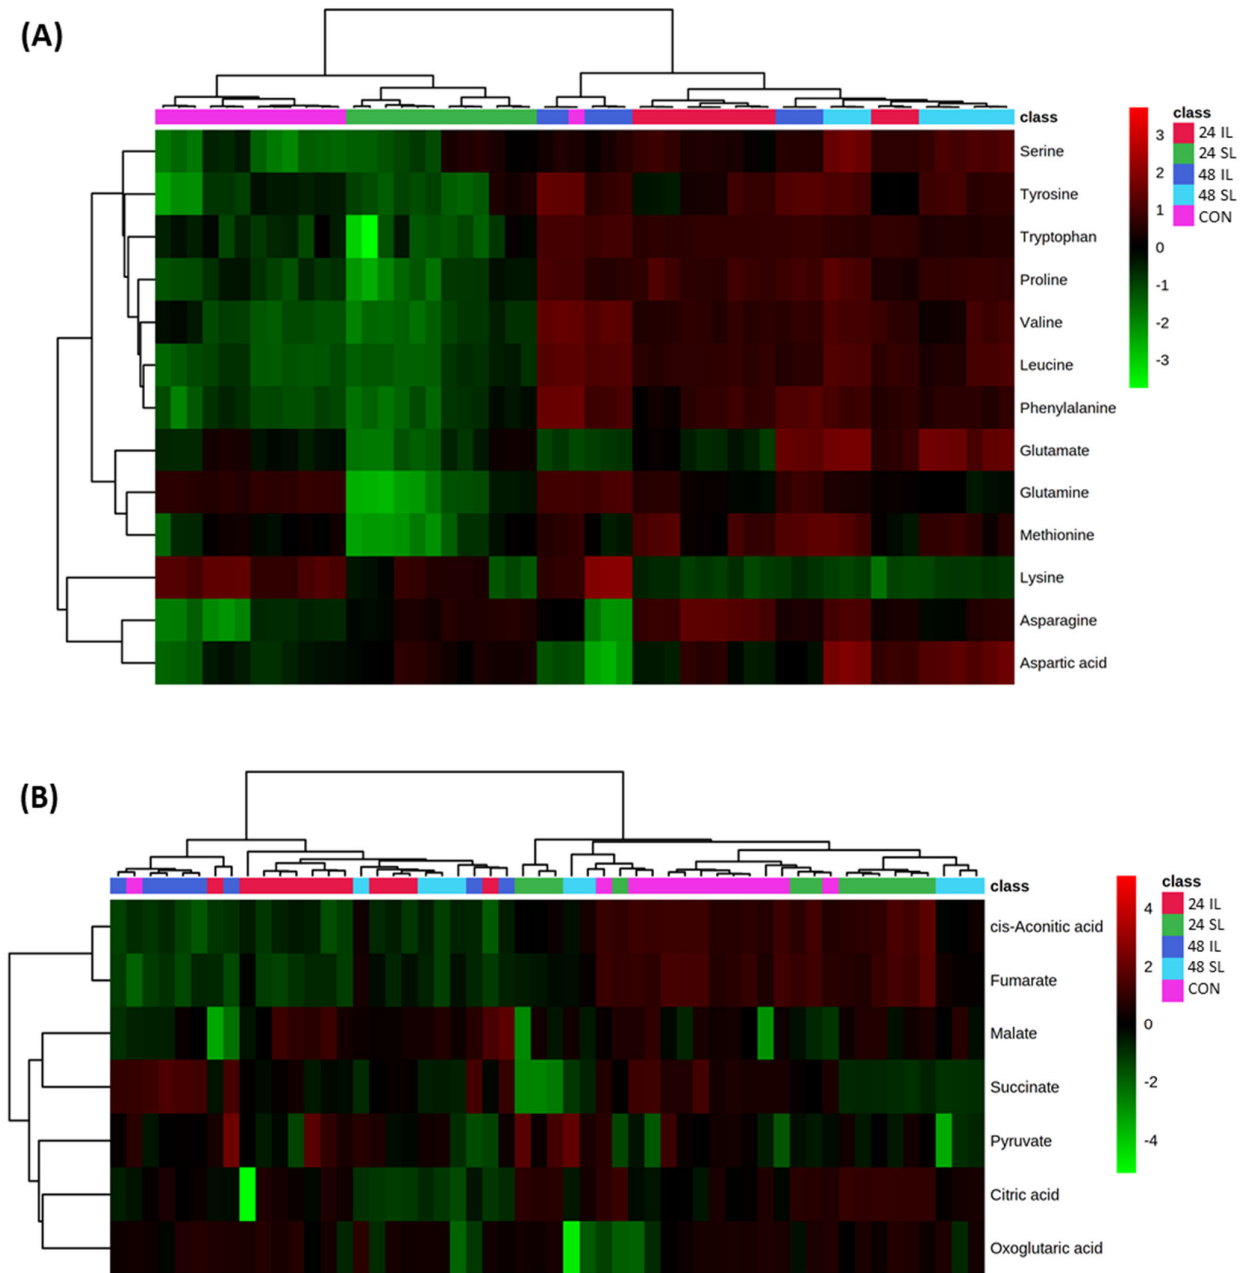

**Figure S2:** Heat map showing the changes in (A) amino acid and (B) citric acid cycle metabolism in Black Pepper (*Piper nigrum* L.) leaves challenged with *Phytophthora capsici*.

Amino acid variation in leaves at the site of infection (i-L) and in the leaf immediately above the infection site (i-SL, systemic leaf) at 24 and 48 h after challenge and controls (CON). The relative accumulation of each is displayed using a heat map.
